# Supplementary material for: Plasticity of Naturally Occurring Regulatory T Cells in Allergic Airway Disease Is Modulated by the Transcriptional Activity of Il-6
Source: MDPI journal article supplement (doi:10.3390/ijms22094582), 2021-04-27
Supplement: s1 [file s1]

# Plasticity of Naturally Occurring Regulatory T Cells in Allergic Airway Disease is Modulated by the Transcriptional Activity of *Il-6*

Morgan MacBeth <sup>1,2</sup>, Anthony Joetham <sup>1</sup>, Erwin W. Gelfand <sup>1</sup> and Michaela Schedel <sup>1,3,4,\*</sup>

<sup>1</sup> Division of Allergy and Immunology and Cell Biology, Department of Pediatrics, National Jewish Health, Denver, CO 80206, USA; morgan.macbeth@cuanschutz.edu (M.M.); joethama@njhealth.org (A.J.), erwin3460@gmail.com (E.W.G.)

<sup>2</sup> Department of Medical Oncology, University of Colorado, Denver, CO 80206, USA

<sup>3</sup> Department of Pulmonary Medicine, University Medical Center Essen-Ruhrlandklinik, 45239 Essen, Germany; michaela.schedel@rlk.uk-essen.de (M.S.)

<sup>4</sup> University Hospital Essen, University Duisburg-Essen, 45147 Essen, Germany

\* Correspondence: michaela.schedel@rlk.uk-essen.de; Tel.: +49-201-723-82545

Citation: MacBeth, M.; Joetham, A.; Gelfand, E.W.; Schedel, M. Plasticity of Naturally Occurring Regulatory T Cells in Allergic Airway Disease Is Modulated by the Transcriptional Activity of *Il-6*. *Int. J. Mol. Sci.* 2021, 22, 4582.

<https://doi.org/10.3390/ijms22094582>

Academic Editor: Daniel P. Potaczek

Received: 23 March 2021

Accepted: 26 April 2021

Published: 27 April 2021

**Publisher's Note:** MDPI stays neutral with regard to jurisdictional claims in published maps and institutional affiliations.

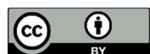

**Copyright:** © 2021 by the authors. Licensee MDPI, Basel, Switzerland. This article is an open access article distributed under the terms and conditions of the Creative Commons Attribution (CC BY) license (<http://creativecommons.org/licenses/by/4.0/>).

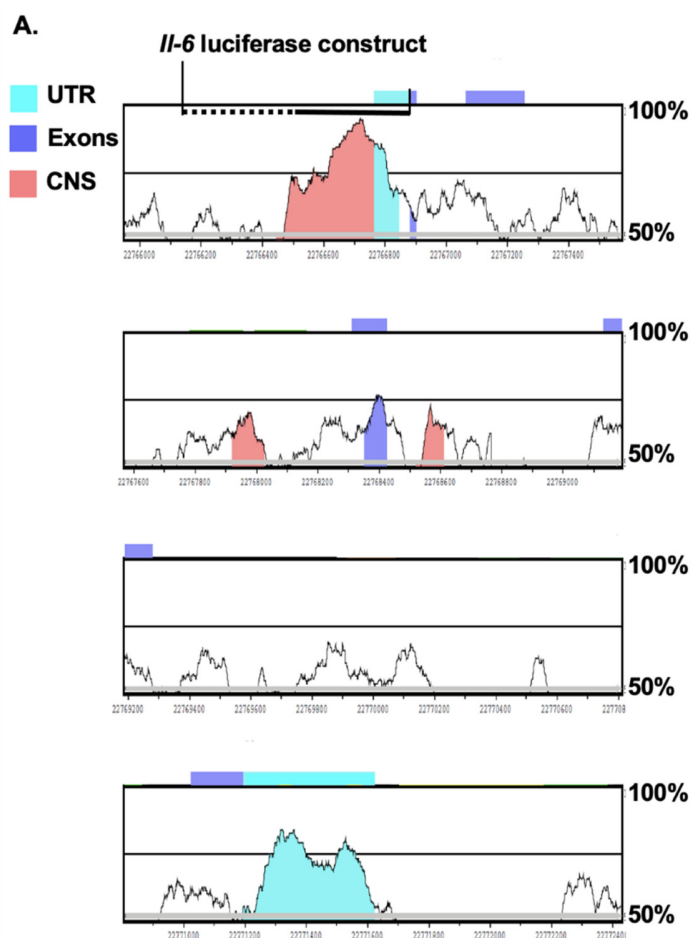

**Online Supplemental Figure 1A. The promoter regions of the human *Il-6* and mouse *Il-6* promoter share high homology.** Percentage of alignment between the human *Il-6* and mouse *Il-6* gene using the VISTA genome browser software. Location of the luciferase construct (dotted and solid line) including the region of sequence homology in humans and mice as shown in Online Supplemental Figure 1B (solid line) are

**B.**

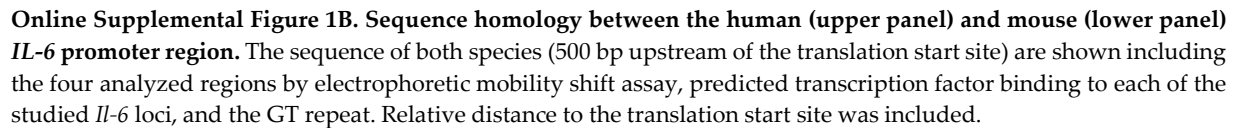

-1139 AGACTTGAGC ATTGGAGGGG TTATTTCAGAG TGAGACGTAC CACCTTCAGA TTCAAATCCT GTCATCCAGT AGAAGGGAGC TTCAACACACA AGCTAGCTAA  
TCTGAACTCG TAACCTCCCC AATAAGTCTC ACTCTGCATG GTGGAAGTCT AAGTTTAGGA CAGTAGGTCA TCTTCCCTCG AAGTTTGTGT TCGATCGATT  
luciferase construct 5' start

-1039 GATACAATGA GGTCTTCTTT CGATATCTTT ATCTTCCATA TACCATGAAT CAAAGAACT TCAACAACAT GAGGACTGCA ACAGACCTTC AAGCCTCCTT  
CTATGTTACT CCAGGAAGAA GGTATAGAAA TAGAAGGTAT ATGGTACTTA GTTCTTTGA AGTTGTTGA CTCCTGACGT TGTCTGGAAG TTCGGAGGAA

-939 GCATGACCTG GAAATGTTTT GGGGTGTCTT GGCAGCAGTG GGATCAGCAC TAACAGATAA GGGCAACTCT CACAGAGACT AAAGGTCTTA ACTAAGAAGA  
CGTACTGGAC CTTTACAAAA CCCACAGGA CCGTCGTCAC CCTAGTCGTG ATTGTCTATT CCCGTTGAGA GTGTCTCTGA TTTCCAGAAAT TGATTCTTCT

-839 TAGCCAAGAG ACCACTGGGG AGAATGCAGA GAATAGGCTT GGACTTGGAA GCCAAGATTG CTTGACAACA GACAGAAGAT ATTTCTGTAC TTCACCCACT  
ATCGGTTCTC TGGTGACCCC TCTTACGTCT CTTATCCGAA CCTGAACCTT CGGTCTTAAC GAACTGTTGT CTGTCTTCTA TAAAGACATG AAGTGGGTGA

-739 TTACCCACCT GGCAACTCCT GGAACAACCT GCACAAAATT TGGAGGTGAA CAAACCATTG GAAACAACCTG GTCCTGACAA GACACAGGAA AAACAAGCAA  
AATGGGTGGA CCGTTGAGGA CTTTGTGTA CGTGTGTTAA ACCTCCACTT GTTGGTAAT CTTGTTGAC CAGGACTGTT CTGTCTCCTT TTTGTTCTGT

-639 TATGCAACAT TACTGTCTGT TGTCCAGGTT GGGTGCTGGG GGTGGGAGAG GGAGTGTGTG TCTTTGTATG ATCTGAAAA ACTCAGGTCA GAACATCTGT  
ATACGTTGTA ATGACAGACA ACAGGTCCAA CCCACGACCC CCACCTCTC COTCACACAC AGAACATAC TAGACTTTTT TGAGTCCAGT CTTGTAGACA  
GT-repeat

-539 AGATCCTTAC AGACATACAA AAGAATCCTA GCCTCTTATT CATGTGTGTG TGTGTGTGTG TGTGTGTGTG TGTGTGTGTG TGTGTGTGTA TGTGTGTGTC  
TCTAGGAATG TCTGTATGTT TTCTTAGGAT CGGAGATAAA GTACACACAC ACACACACAC ACACACACAC ACACACACAC ACACACACAT ACACACACAG

II-6\_4 (predicted: EBOX)

-439 GTCTGTCATG CGCGCGTGCC TCGGTTTAAA TAACATCAGC TTTAGCTTCT CTTTCTCCTT ATAAACATT GTGAATTCA GTTTCTTTTC CCATCAGAC  
CAGACAGTAC CGCGCGCAGG ACGCAAATTT ATTGTAGTCG AATCGAAGA GAAAGAGGAA TATTTTGTAA CACTTAAAGT CAAAAGAAAG GGTAGTTCTG

II-6\_3 (predicted: AP1)

-339 ATGCTCAAGT GCTGAGTCAC TTTTAAAGAA AAAAAAGAAG AGTGCTCATG CTTCTTAGGG CTAGCCTCAA GGATGACTTA AGCACAATTT CCCCTTCCTA  
TACGAGTTCA CGACTCAGT AAAATTTCTT TTTTCTTTC TCACGAGTAC GAAGAATCCC GATCGGAGTT CCTACTGAAT TCGTGTGAAA GGGGAAGGAT

II-6\_2 (predicted: C/EBP)

-239 GTTGTGATTC TTTCGATGCT AAACGACGTC ACATTGTGCA ATCTTAATAA GGTTCCTAAT CAGCCCCACC CACTCTGGCC CCACCCCCAC CCTCCACAA  
CAACACTAAG AAAGCTACGA TTGCTGCAG TGTAAACAGT TAGAATTATT CCAAAGGTTA GTCGGGGTGG GTGAGACCGG GGTGGGGGTG GGAGGTTGTT

transcription start site

II-6\_1 (predicted: NF-κB)

-139 AGATTTTAT CAAATGTGGG ATTTTCCCAT GAGTCTCAAA ATTAGAGAGT TGACTCCTAA TAAATATGAG ACTGGGGATG TCTGTAGCTC ATTCTGCTCT  
TCTAAAAATA GTTTACACCC TAAAGGGTA CTCAGAGTTT TAATCTCTCA ACTGAGGATT ATTTATACTC TGACCCCTAC AGACATCGAG TAAGACGAGA

translation start site

-39 GGAGCCACCC AAGAACGATA GTCAATTCCA GAAACCGCTT TGAAGTTCCT CTCTGCAAGT AAGTGAAGGC AGTTCCTTGC CCTCTGGCGG AGCTATTGAG  
CCTCGGGTGG TTCTTCTAT CAGTTAAGGT CTTTGGCGAT ACTTCAAGGA GAGACGTTCA TTCACTTCCG TCAAGGAACG GGAGACCGCC TCGATACTC

luciferase construct 3' end

**Online Supplemental Figure 2. Sequence of the mouse *Il-6* promoter region.** The four analyzed regions by electrophoretic mobility shift assay and the GT repeat are underlined. The location of the cloned *Il-6* promoter region is depicted. Transcription and translation start site of *Il-6* are marked. Relative distance to the translation start site is shown.

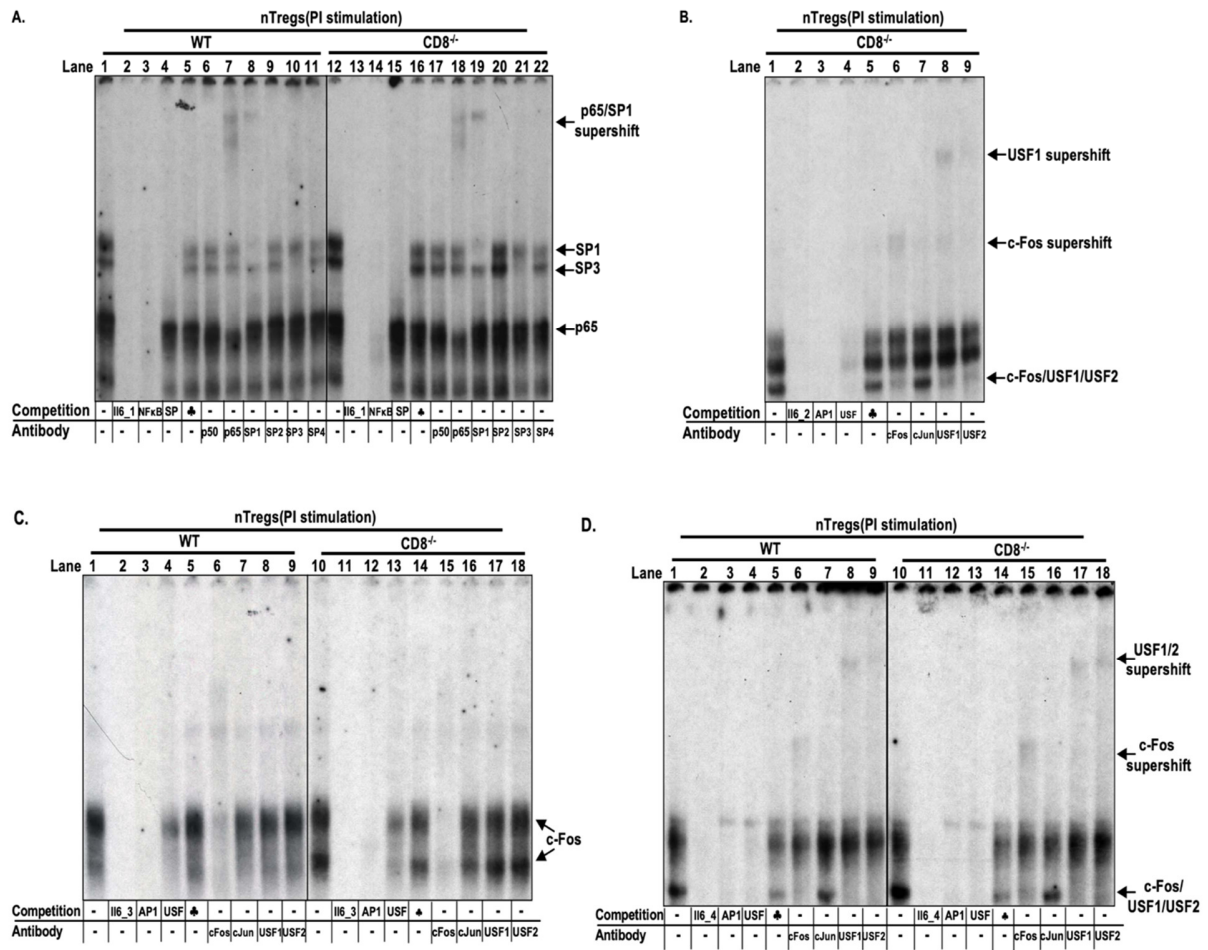

**Online Supplemental Figure 3. Distinct affinity of transcription factor binding to promoter regions within the *Il-6* gene in nTregs from wild-type (WT) and CD8<sup>-/-</sup> mice.** A-D. EMSA analyses of four different *Il-6* promoter loci upstream of the transcription start site of the *Il-6* gene were performed including A. *Il-6*\_1, B. *Il-6*\_2, C. *Il-6*\_3, and D. *Il-6*\_4 using nuclear extract isolated from nTregs of WT or CD8<sup>-/-</sup> (KO) mice (5 µg) stimulated with PMA/ionomycin (50 ng/ml/1 µM) for 3 hours. Competitors (100-fold molar excess) and supershift antibodies (4 µg) for each experiment are noted below the respective lanes. ♦: competition experiment using an unrelated oligo.

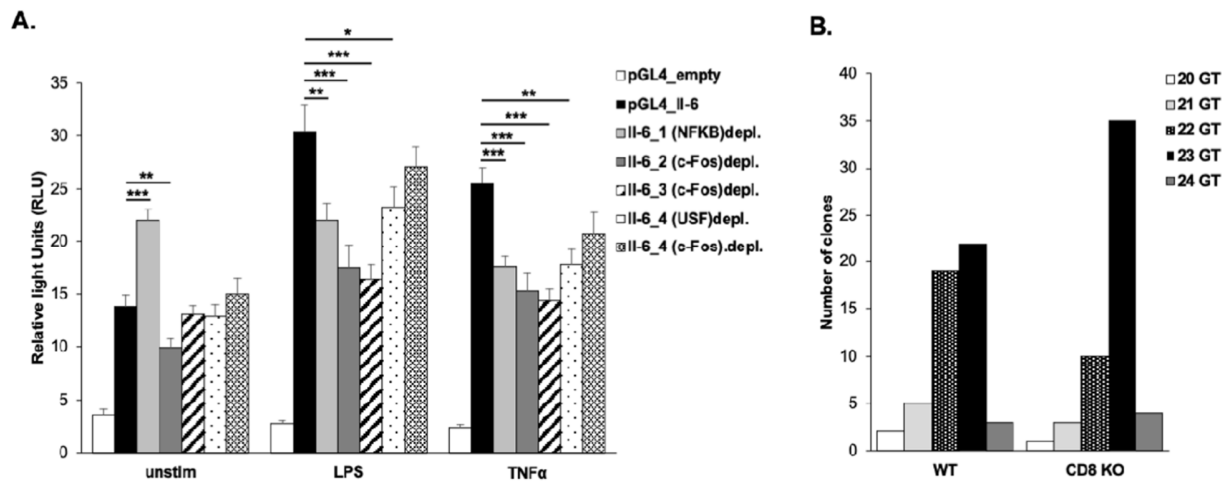

**Online Supplemental Figure 4. Four defined regions are essential for transcription factor binding and a novel variable length STR is found in the *Il-6* promoter** **A.** NIH3T3 cells were transiently transfected with the empty pGL4 luciferase vector (pGL4 empty) or with different reporter constructs of the *Il-6* promoter (1,138 bp). In the construct *Il-6*\_1 (NF-κB)depl., the NF-κB binding site as identified by EMSA within *Il-6*\_1 was depleted by site-directed mutagenesis. Correspondingly, the c-Fos binding site within *Il-6*\_2 [*Il-6*\_2(c-Fos)depl.], the c-Fos binding site within *Il-6*\_3 [*Il-6*\_3(c-Fos)depl.], the USF binding site within *Il-6*\_4 [*Il-6*\_4(USF)depl.], and the c-Fos binding site within *Il-6*\_4 [*Il-6*\_4(c-Fos)depl.] were mutated (4-5 independent experiments, 2 technical replicates). Cells were left in medium or stimulated with 10 ng/ml LPS or 0.5 ng/ml TNFα. Luciferase activity was normalized for transfection efficiency using the control plasmid pRL-TK. The relative luciferase activity is presented in relative light units (RLU). Paired, two tailed students t-test was performed. \*p≤0.05, \*\*p≤0.01, \*\*\*p≤0.001. **B.** *Il-6* luciferase promoter constructs were generated using DNA isolated from wild-type (WT) or CD8<sup>-/-</sup> (CD8 KO) nTregs. To determine the distribution of a GT short tandem repeat in nTregs of both strains, a total of 104 clones (WT=51, CD8<sup>-/-</sup>=53) were sequenced. Distribution of number of clones in nTregs from each strain containing 20-24 GT repeats are depicted.

**Supplemental Table 1: *In silico* transcription factor (TF) binding analyses of the *Il-6* promoter region including 600 bp upstream of the translation start site.** Relative distance upstream of the translation start site and the chromosomal strand (+ or -) of the predicted binding of the TF are depicted. Capital letters in the sequence indicate the core sequence of a predicted TF binding matrix with the highest degree of conservation. Letters marked in red reflect the conserved sequences (>60%) between the TF matrix and *Il-6*. Marked in bold are predicted TF binding regions further evaluated by electrophoretic mobility shift assay.

| TF                 | TF family   | Name of TF family                                        | Relative distance to TLSS (bp) |             | Strand   | Core similarity | Matrix similarity | Sequence                           |
|--------------------|-------------|----------------------------------------------------------|--------------------------------|-------------|----------|-----------------|-------------------|------------------------------------|
| <i>BTEB3</i>       | <i>KLFS</i> | Krueppel like transcription factors                      | -595                           | -579        | +        | 1.000           | 0.939             | ggagag <b>GGAG</b> gtgtgt          |
| <i>GAGA</i>        | <i>GABF</i> | GA-boxes                                                 | -598                           | -574        | +        | 1.000           | 0.81              | gtggg <b>AGAG</b> ggagtgtgtccttg   |
| <i>TIEG</i>        | <i>SP1F</i> | GC-Box factors SP1/GC                                    | -591                           | -577        | +        | 0.750           | 0.879             | ag <b>GGAG</b> gtgtgtct            |
| <i>TAXCREB</i>     | <i>CREB</i> | cAMP-responsive element binding proteins                 | -591                           | -571        | -        | 0.750           | 0.713             | atacaa <b>AGAC</b> acactccct       |
| <i>GATA3</i>       | <i>GATA</i> | GATA binding factors                                     | -575                           | -563        | -        | 1.000           | 0.932             | ttc <b>AGAT</b> cataca             |
| <i>AREB6</i>       | <i>ZFHX</i> | Two-handed zinc finger homeodomain transcription factors | -559                           | -547        | -        | 1.000           | 0.945             | ttctg <b>ACCT</b> gagt             |
| <i>REV-ERBA</i>    | <i>RORA</i> | v-ERB and RAR-related orphan receptor alpha              | -563                           | -541        | +        | 1.000           | 0.895             | aaaaactcag <b>GTC</b> Agaacatctg   |
| <i>FHXB</i>        | <i>FKHD</i> | Fork head domain factors                                 | -556                           | -540        | +        | 0.818           | 0.853             | caggtc <b>AGAA</b> catctgt         |
| <i>TAL1ALPHA47</i> | <i>HAND</i> | Twist subfamily of class B bHLH transcription factors    | -554                           | -534        | -        | 1.000           | 0.952             | ggatcta <b>CAGAt</b> ttctgacc      |
| <i>NGN_NEUROD</i>  | <i>NEUR</i> | NeuroD, Beta2, HLH domain                                | -550                           | -538        | +        | 1.000           | 0.985             | agaa <b>CATC</b> gttag             |
| <i>RP58</i>        | <i>RP58</i> | RP58 (ZFP238) zinc finger protein                        | -550                           | -538        | +        | 1.000           | 0.954             | agaa <b>CATC</b> gttag             |
| <i>PRE</i>         | <i>GREF</i> | Glucocorticoid responsive and related elements           | -552                           | -534        | -        | 1.000           | 0.851             | ggatctacaga <b>TGT</b> ctga        |
| <i>POU3F3</i>      | <i>OCT1</i> | Octamer binding protein                                  | -510                           | -494        | -        | 0.784           | 0.823             | cacat <b>GAAT</b> aaggagct         |
| <i>PIT1</i>        | <i>PIT1</i> | GHF-1 pituitary specific pou domain transcription factor | -509                           | -495        | +        | 1.000           | 0.93              | gcctc <b>TAT</b> tcatgt            |
| <i>PAX4_PD</i>     | <i>PAX6</i> | PAX-4/PAX-6 paired domain binding sites                  | -436                           | -418        | -        | 1.000           | 0.919             | cag <b>GCA</b> Cgcgcgatgaca        |
| <i>ZF5</i>         | <i>ZF5F</i> | ZF5 POZ domain zinc finger                               | -432                           | -422        | +        | 1.000           | 0.967             | atg <b>cCGC</b> Cgtg               |
| <i>HELT</i>        | <i>HESF</i> | Vertebrate homologues of enhancer of split complex       | -432                           | -418        | -        | 1.000           | 0.959             | cagg <b>CACG</b> cgcgat            |
| <i>AHRARNT</i>     | <i>AHRR</i> | AHR-amt heterodimers and AHR-related factors             | -436                           | -412        | +        | 1.000           | 0.952             | tgtcatgcgc <b>CCGT</b> gcctgcgttta |
| <b>MYCMAX</b>      | <b>EBOX</b> | <b>E-box binding factors</b>                             | <b>-430</b>                    | <b>-418</b> | <b>-</b> | <b>1.000</b>    | <b>0.921</b>      | <b>caggcaCGCGcgc</b>               |
| <i>OTP</i>         | <i>CART</i> | Cart-1 (cartilage homeoprotein 1)                        | -423                           | -403        | -        | 0.751           | 0.841             | gatgtt <b>ATT</b> Taaacgcaggca     |

|                  |             |                                                             |      |      |   |       |       |                         |
|------------------|-------------|-------------------------------------------------------------|------|------|---|-------|-------|-------------------------|
| <i>E4BP4</i>     | <i>CREB</i> | cAMP-responsive element binding proteins                    | -421 | -401 | - | 0.758 | 0.852 | ctgatgttatTTAAacgcagg   |
| <i>TEF_HLF</i>   | <i>PARF</i> | PAR/bZIP family                                             | -419 | -403 | + | 0.784 | 0.82  | tcggtTTAAataacatc       |
| <i>E4BP4</i>     | <i>CREB</i> | cAMP-responsive element binding proteins                    | -420 | -400 | + | 0.769 | 0.803 | ctgcgtttaaATAAcatcagc   |
| <i>LHX3</i>      | <i>LHXF</i> | Lim homeodomain factors                                     | -421 | -399 | - | 0.751 | 0.812 | agctgatgttATTTaaacgcagg |
| <i>TEF</i>       | <i>PARF</i> | PAR/bZIP family                                             | -418 | -402 | - | 0.773 | 0.888 | tgatgttatTTAAacgc       |
| <i>MTBF</i>      | <i>HMTB</i> | Human muscle-specific Mt binding site                       | -413 | -405 | - | 1.000 | 0.902 | tgttATTTa               |
| <i>PROPI</i>     | <i>CART</i> | Cart-1 (cartilage homeoprotein 1)                           | -418 | -398 | + | 0.753 | 0.844 | gcgtttAAATaacatcagctt   |
| <i>CREB</i>      | <i>CREB</i> | cAMP-responsive element binding proteins                    | -416 | -396 | - | 0.862 | 0.863 | taaagcTGATgttatttaaac   |
| <i>BARBIE</i>    | <i>BARB</i> | Barbiturate-inducible element box from pro-eukaryotic genes | -407 | -393 | - | 1.000 | 0.91  | agctAAAGctgatgt         |
| <i>EVI1</i>      | <i>EVI1</i> | EVI1-myeloid transforming protein                           | -403 | -387 | - | 0.750 | 0.841 | aaagagAAGCtaaagctg      |
| <i>IRF7</i>      | <i>IRFF</i> | Interferon regulatory factors                               | -401 | -381 | - | 1.000 | 0.892 | aggaGAAAgagaagctaaagc   |
| <i>LTATA</i>     | <i>VTBP</i> | Vertebrate TATA binding protein factor                      | -390 | -374 | - | 1.000 | 0.84  | tttTATAaggagaaaga       |
| <i>HOXD13</i>    | <i>ABDB</i> | Abdominal-B type homeodomain transcription factors          | -386 | -370 | + | 1.000 | 0.919 | tctcctaTAAAcatt         |
| <i>CDX2</i>      | <i>CDXF</i> | Vertebrate caudal related homeodomain protein               | -386 | -368 | - | 1.000 | 0.852 | acaatgtTTTAtaaggaga     |
| <i>PBX_HOXA9</i> | <i>HOXC</i> | HOX - PBX complexes                                         | -384 | -368 | - | 0.750 | 0.849 | acaTGTTttataagga        |
| <i>VTATA</i>     | <i>VTBP</i> | Vertebrate TATA binding protein factor                      | -383 | -367 | + | 1.000 | 0.941 | cctaTAAAcattgtg         |
| <i>FHXB</i>      | <i>FKHD</i> | Fork head domain factors                                    | -378 | -362 | - | 0.909 | 0.855 | aaattcACAAtgttita       |
| <i>FAST1</i>     | <i>FAST</i> | FAST-1 SMAD interacting proteins                            | -375 | -359 | + | 1.000 | 0.884 | aacatTGTGaattcag        |
| <i>IRF1</i>      | <i>IRFF</i> | Interferon regulatory factors                               | -371 | -351 | - | 1.000 | 0.901 | aaagaaaactGAAAttcaca    |
| <i>HMG1Y</i>     | <i>SORY</i> | SOX/SRY-sex/testis determinig and related HMG box factors   | -372 | -350 | + | 1.000 | 0.93  | attgtgAATTcagttttcttc   |
| <i>DINR</i>      | <i>INRE</i> | Core promoter initiator elements                            | -364 | -354 | + | 1.000 | 0.965 | ttTCAGtttc              |
| <i>RBPJK</i>     | <i>RBPF</i> | RBPJ - kappa                                                | -357 | -343 | - | 1.000 | 0.946 | ttgaTGGGaaagaaa         |
| <i>PAX1</i>      | <i>PAX1</i> | PAX-1 binding sites                                         | -355 | -337 | + | 0.750 | 0.689 | tCTTTcccatcaagacatg     |
| <i>OCT3_4</i>    | <i>OCT1</i> | Octamer binding protein                                     | -342 | -326 | + | 1.000 | 0.824 | gacATGCtcaagtgtg        |
| <i>P53</i>       | <i>P53F</i> | p53 tumor suppressor                                        | -344 | -322 | - | 1.000 | 0.935 | gactcagcacttgagCATGtctt |
| <i>DEC2</i>      | <i>HESF</i> | Vertebrate homologues of enhancer of split complex          | -339 | -325 | - | 0.871 | 0.972 | tcagcaCTTGagcat         |
| <i>NKX25</i>     | <i>NKXH</i> | NKX homeodomain factors                                     | -339 | -321 | + | 1.000 | 1     | atgctcAAGTgctgagtca     |

|                  |             |                                                                              |             |             |          |              |              |                                  |
|------------------|-------------|------------------------------------------------------------------------------|-------------|-------------|----------|--------------|--------------|----------------------------------|
| <i>TCF11MAFG</i> | <i>AP1R</i> | MAF and AP1 related factors                                                  | -335        | -315        | -        | 1.000        | 0.957        | taaaag <b>TGAC</b> tcagcactga    |
| <b>AP1</b>       | <b>AP1F</b> | <b>AP1, Activating protein 1</b>                                             | <b>-329</b> | <b>-319</b> | <b>+</b> | <b>1.000</b> | <b>0.968</b> | <b>gctgAGTCact</b>               |
| <b>AP1</b>       | <b>AP1F</b> | <b>AP1, Activating protein 1</b>                                             | <b>-329</b> | <b>-319</b> | <b>-</b> | <b>0.971</b> | <b>0.974</b> | <b>agTGACtcagc</b>               |
| <i>NFE2</i>      | <i>AP1R</i> | MAF and AP1 related factors                                                  | -333        | -313        | +        | 1.000        | 1            | aagt <b>gCTGA</b> gtcacttttaa    |
| <i>VTATA</i>     | <i>VTBP</i> | Vertebrate TATA binding protein factor                                       | -326        | -310        | -        | 1.000        | 0.927        | ttct <b>TAA</b> Aagtgactc        |
| <i>BARBIE</i>    | <i>BARB</i> | Barbiturate-inducible element box from pro+eukaryotic genes                  | -310        | -296        | +        | 1.000        | 0.888        | aaaa <b>AAAG</b> aagagtg         |
| <i>EVI1.07</i>   | <i>EVI1</i> | EVI1-myeloid transforming protein                                            | -310        | -294        | +        | 1.000        | 0.916        | aaaaa <b>AAGA</b> aagtgct        |
| <i>PAX2</i>      | <i>PAX8</i> | PAX-2/5/8 binding sites                                                      | -297        | -283        | +        | 0.923        | 0.94         | tg <b>CTCA</b> tgcttctta         |
| <i>HMX2</i>      | <i>HOMF</i> | Homeodomain transcription factors                                            | -272        | -254        | +        | 1.000        | 0.916        | caaggatga <b>CTTA</b> agcaca     |
| <i>CREB2</i>     | <i>CREB</i> | cAMP-responsive element binding proteins                                     | -272        | -252        | +        | 1.000        | 0.906        | caagga <b>TGAC</b> ttagcacact    |
| <i>ATATA</i>     | <i>VTBP</i> | Vertebrate TATA binding protein factor                                       | -269        | -253        | -        | 1.000        | 0.812        | gtgt <b>gctTAAG</b> tcaccc       |
| <i>HMX2</i>      | <i>HOMF</i> | Homeodomain transcription factors                                            | -267        | -249        | -        | 1.000        | 0.896        | gaaagtgtg <b>CTTA</b> agtcac     |
| <i>MYT1</i>      | <i>MYT1</i> | MYT1 C2HC zinc finger protein                                                | -260        | -248        | -        | 1.000        | 0.799        | gga <b>AAGT</b> gtgctt           |
| <i>BLIMP1</i>    | <i>PRDF</i> | Positive regulatory domain I binding factor                                  | -261        | -243        | -        | 1.000        | 0.838        | gaaggga <b>GAAA</b> gtgtgctta    |
| <i>IRF7</i>      | <i>IRFF</i> | Interferon regulatory factors                                                | -259        | -239        | -        | 0.821        | 0.905        | ctag <b>GAA</b> Ggggaaagtgtgct   |
| <i>MZF1</i>      | <i>MZF1</i> | Myeloid zinc finger 1 factors                                                | -254        | -244        | -        | 1.000        | 1            | aa <b>GGGG</b> aaagt             |
| <i>GABP</i>      | <i>ETSF</i> | Human and murine ETS1 factors                                                | -254        | -234        | -        | 1.000        | 0.868        | cacaacta <b>GGA</b> Aggggaaagt   |
| <i>IRF4</i>      | <i>IRFF</i> | Interferon regulatory factors                                                | -236        | -216        | -        | 1.000        | 0.942        | gtttagcatc <b>GAAA</b> gaatcac   |
| <i>PAX2</i>      | <i>PAX2</i> | PAX-2 binding sites                                                          | -236        | -214        | +        | 1.000        | 0.788        | gtgattcttcgatgct <b>AAAC</b> Gga |
| <i>CREB1</i>     | <i>CREB</i> | cAMP-responsive element binding proteins                                     | -223        | -203        | -        | 1.000        | 0.974        | acaatg <b>TGAC</b> gtcggttagca   |
| <i>E4F</i>       | <i>E4FF</i> | Ubiquitous GLI - Krueppel like zinc finger involved in cell cycle regulation | -217        | -205        | +        | 1.000        | 0.893        | <b>acgACGT</b> cacatt            |
| <i>CREB</i>      | <i>CREB</i> | cAMP-responsive element binding proteins                                     | -220        | -200        | -        | 1.000        | 0.902        | tgcaaatg <b>TGAC</b> gtcggtta    |
| <i>SOX9</i>      | <i>SORY</i> | SOX/SRY-sex/testis determinig and related HMG box factors                    | -218        | -196        | -        | 1.000        | 0.944        | agattgc <b>ACAA</b> tgtgacgtcggt |
| <b>CEBPB</b>     | <b>CEBP</b> | <b>Ccaat/Enhancer Binding Protein</b>                                        | <b>-210</b> | <b>-196</b> | <b>+</b> | <b>1.000</b> | <b>0.989</b> | <b>cacattgtGCAAtct</b>           |



|              |             |                                                             |      |      |   |       |       |                                       |
|--------------|-------------|-------------------------------------------------------------|------|------|---|-------|-------|---------------------------------------|
| <i>HLF</i>   | <i>PARF</i> | PAR/bZIP family                                             | -211 | -195 | + | 0.836 | 0.869 | tcacattgt <b>GCAA</b> tctt            |
| <i>HHEX</i>  | <i>HOMF</i> | Homeodomain transcription factors                           | -206 | -188 | + | 1.000 | 0.953 | ttgtgcaatct <b>TAATA</b> aagg         |
| <i>BRN3</i>  | <i>BRNF</i> | Brn POU domain factors                                      | -202 | -184 | + | 1.000 | 0.84  | gcaatct <b>TAATA</b> aaggttc          |
| <i>VAX2</i>  | <i>HBOX</i> | Homeobox transcription factors                              | -202 | -184 | - | 1.000 | 0.852 | gaaacct <b>ATTA</b> agattgc           |
| <i>BARX2</i> | <i>HOMF</i> | Homeodomain transcription factors                           | -202 | -184 | + | 1.000 | 0.952 | gcaatct <b>TAATA</b> aaggttc          |
| <i>NKX61</i> | <i>NKX6</i> | NK6 homeobox transcription factors                          | -200 | -186 | + | 1.000 | 0.915 | aatc <b>TTAA</b> aaggtt               |
| <i>BRN5</i>  | <i>BRN5</i> | Brn-5 POU domain factors                                    | -203 | -181 | - | 1.000 | 0.922 | ttggaaacct <b>ATTA</b> agattgca       |
| <i>OCT1</i>  | <i>OCT1</i> | Octamer binding protein                                     | -200 | -184 | - | 1.000 | 0.861 | gaaacct <b>ATTA</b> agatt             |
| <i>NKX25</i> | <i>NKXH</i> | NKX homeodomain factors                                     | -200 | -182 | + | 1.000 | 0.899 | aatct <b>TAATA</b> aaggtttcca         |
| <i>NFAT5</i> | <i>NFAT</i> | Nuclear factor of activated T-cells                         | -198 | -180 | - | 1.000 | 0.888 | att <b>GGAA</b> acctattaaga           |
| <i>BRN2</i>  | <i>BRNF</i> | Brn POU domain factors                                      | -195 | -177 | - | 0.900 | 0.879 | ctG <b>ATT</b> Tggaaacctatta          |
| <i>NFY</i>   | <i>CAAT</i> | CCAAT binding factors                                       | -188 | -174 | + | 1.000 | 0.951 | gttt <b>CCA</b> Atcagccc              |
| <i>CDP</i>   | <i>CLOX</i> | CLOX and CLOX homology (CDP) factors                        | -189 | -171 | + | 1.000 | 0.969 | ggtttc <b>CAAT</b> cagccccac          |
| <i>INSM1</i> | <i>INSM</i> | Insulinoma associated factors                               | -180 | -168 | - | 1.000 | 0.907 | tgggt <b>GGGG</b> ctga                |
| <i>BKLF</i>  | <i>KLFS</i> | Krueppel like transcription factors                         | -182 | -166 | - | 1.000 | 0.99  | agt <b>GGGT</b> ggggctgatt            |
| <i>MAZR</i>  | <i>MAZF</i> | Myc associated zinc fingers                                 | -179 | -167 | - | 1.000 | 0.895 | gtgggt <b>GGGG</b> ctg                |
| <i>GC</i>    | <i>SP1F</i> | GC-Box factors SP1/GC                                       | -180 | -166 | - | 0.872 | 0.942 | agt <b>GGT</b> Ggggctga               |
| <i>WT1</i>   | <i>EGRF</i> | EGR/nerve growth factor induced protein C & related factors | -179 | -163 | - | 1.000 | 0.932 | cagag <b>TGGG</b> tggggctg            |
| <i>GLI3</i>  | <i>GLIF</i> | GLI zinc finger family                                      | -178 | -164 | + | 1.000 | 0.881 | agcc <b>CCAC</b> ccactct              |
| <i>NGFIC</i> | <i>EGRF</i> | EGR/nerve growth factor induced protein C & related factors | -177 | -161 | - | 0.770 | 0.833 | gcca <b>GAGT</b> gggtggggc            |
| <i>PLAG1</i> | <i>PLAG</i> | Pleomorphic adenoma gene                                    | -176 | -156 | - | 0.833 | 0.881 | <b>GTGG</b> ggccagagt <b>gg</b> tgggg |
| <i>BKLF</i>  | <i>KLFS</i> | Krueppel like transcription factors                         | -167 | -151 | - | 1.000 | 0.998 | tgg <b>GGGT</b> ggggccagag            |
| <i>MAZR</i>  | <i>MAZF</i> | Myc associated zinc fingers                                 | -164 | -152 | - | 1.000 | 0.949 | gggggt <b>GGG</b> cca                 |
| <i>GC</i>    | <i>SP1F</i> | GC-Box factors SP1/GC                                       | -165 | -151 | - | 0.872 | 0.945 | tggg <b>GGT</b> Ggggccag              |
| <i>GKLF</i>  | <i>KLFS</i> | Krueppel like transcription factors                         | -165 | -149 | - | 1.000 | 0.984 | ggtgggg <b>GTGG</b> ggccag            |
| <i>PLAG1</i> | <i>PLAG</i> | Pleomorphic adenoma gene                                    | -166 | -146 | - | 1.000 | 0.885 | <b>GAGG</b> gtgggggtggggccaga         |
| <i>ZBP89</i> | <i>ZBPF</i> | Zinc binding protein factors                                | -166 | -144 | + | 1.000 | 0.976 | tctggcccca <b>CCCC</b> accctcca       |
| <i>WT1</i>   | <i>EGRF</i> | EGR/nerve growth factor induced protein C & related factors | -162 | -146 | - | 1.000 | 0.998 | gaggg <b>TGGG</b> gtggggc             |

|                        |                    |                                                                            |             |             |          |              |              |                         |
|------------------------|--------------------|----------------------------------------------------------------------------|-------------|-------------|----------|--------------|--------------|-------------------------|
| <i>RREB1</i>           | <i>RREB</i>        | Ras-responsive element binding protein                                     | -161        | -147        | +        | 1.000        | 0.876        | cCCCAccccacct           |
| <i>BKLF</i>            | <i>KLFS</i>        | Krueppel like transcription factors                                        | -161        | -145        | -        | 1.000        | 0.974        | ggaGGGTgggggtgggg       |
| <i>GC</i>              | <i>SP1F</i>        | GC-Box factors SP1/GC                                                      | -159        | -145        | -        | 0.872        | 0.893        | ggagGGTGgggggtgg        |
| <i>ZNF219</i>          | <i>ZBPF</i>        | Zinc binding protein factors                                               | -163        | -141        | +        | 1.000        | 0.941        | ggccccCCCCcaccctcaaca   |
| <i>SPZ1</i>            | <i>SPZ1</i>        | Testis-specific bHLH-Zip transcription factors                             | -154        | -144        | -        | 1.000        | 0.958        | tGGAagggtggg            |
| <i>LEF1</i>            | <i>LEFF</i>        | LEF1/TCF                                                                   | -149        | -133        | +        | 1.000        | 0.876        | cctccaaCAAagatttt       |
| <i>GFI1</i>            | <i>GFI1</i>        | Growth factor independence transcriptional repressor                       | -146        | -132        | -        | 1.000        | 0.905        | aaaAATCttgttgg          |
| <i>SOX2</i>            | <i>SORY</i>        | SOX/SRY-sex/testis determinig and related HMG box factors                  | -150        | -128        | +        | 1.000        | 0.929        | ccctccaACAAagatttttatca |
| <i>CDX2</i>            | <i>CDXF</i>        | Vertebrate caudal related homeodomain protein                              | -141        | -123        | +        | 1.000        | 0.862        | aaagattTTTAatcaatgt     |
| <i>GATA</i>            | <i>GATA</i>        | GATA binding factors                                                       | -137        | -125        | -        | 1.000        | 0.936        | atttGATAaaaat           |
| <i>SMARCA3</i>         | <i>RUSH</i>        | SWI/SNF related nucleophosphoproteins with a RING finger DNA binding motif | -131        | -121        | -        | 0.960        | 0.965        | ccACATttgat             |
| <i>NFAT5</i>           | <i>NFAT</i>        | Nuclear factor of activated T-cells                                        | -128        | -110        | -        | 1.000        | 0.904        | atgGGAAaatccacattt      |
| <b><i>NFκB p65</i></b> | <b><i>NFKB</i></b> | <b>Nuclear factor kappa B/c-rel</b>                                        | <b>-124</b> | <b>-112</b> | <b>+</b> | <b>1.000</b> | <b>0.982</b> | <b>gtgggattTTCCc</b>    |
| <b><i>NFκB</i></b>     | <b><i>NFKB</i></b> | <b>Nuclear factor kappa B/c-rel</b>                                        | <b>-122</b> | <b>-110</b> | <b>-</b> | <b>1.000</b> | <b>0.891</b> | <b>atGGGAaaatccc</b>    |
| <i>IK1</i>             | <i>IKRS</i>        | Ikaros zinc finger family                                                  | -120        | -108        | -        | 1.000        | 0.941        | tcatGGGAaaatc           |
| <i>RBPJK</i>           | <i>RBPF</i>        | RBPJ - kappa                                                               | -121        | -107        | -        | 1.000        | 0.965        | ctcaTGGGaaatcc          |
| <i>OLF1</i>            | <i>NOLF</i>        | Neuron-specific-olfactory factor                                           | -121        | -99         | +        | 1.000        | 0.894        | ggatttTCCCatgagtctcaaaa |
| <i>PHOX2</i>           | <i>CART</i>        | Cart-1 (cartilage homeoprotein 1)                                          | -111        | -91         | -        | 1.000        | 0.882        | ctctcTAATtttgagactcat   |
| <i>MSX</i>             | <i>HOMF</i>        | Homeodomain transcription factors                                          | -107        | -89         | -        | 1.000        | 0.989        | aactctcTAATtttgagac     |
| <i>GSH1</i>            | <i>HBOX</i>        | Homeobox transcription factors                                             | -104        | -86         | -        | 1.000        | 0.881        | gtcaactctcTAATttga      |
| <i>MYT1L</i>           | <i>MYT1</i>        | MYT1 C2HC zinc finger protein                                              | -96         | -84         | +        | 1.000        | 0.945        | agagAGTTgactc           |
| <i>HOXC13</i>          | <i>ABDB</i>        | Abdominal-B type homeodomain transcription factors                         | -88         | -72         | +        | 1.000        | 0.949        | gactcctaaTAAAtatg       |
| <i>BRN3</i>            | <i>BRNF</i>        | Brn POU domain factors                                                     | -88         | -70         | -        | 0.759        | 0.844        | ctcatatTTATtaggagtc     |
| <i>PHOX2</i>           | <i>CART</i>        | Cart-1 (cartilage homeoprotein 1)                                          | -87         | -67         | +        | 1.000        | 0.881        | actccTAATaaatatgagact   |

|               |             |                                                       |     |     |   |       |       |                         |
|---------------|-------------|-------------------------------------------------------|-----|-----|---|-------|-------|-------------------------|
| <i>BRN5</i>   | <i>BRN5</i> | Brn-5 POU domain factors                              | -60 | -38 | + | 0.751 | 0.844 | gtctgtagctcATTCtgctctgg |
| <i>PAX6</i>   | <i>PAX6</i> | PAX-4/PAX-6 paired domain binding sites               | -47 | -29 | - | 1.000 | 0.886 | tgggtgggctCCAGagcaga    |
| <i>HOMER</i>  | <i>HZIP</i> | Homeodomain-leucine zipper transcription factors      | -30 | -16 | - | 1.000 | 0.839 | tgactATCGttcttg         |
| <i>TH1E47</i> | <i>HAND</i> | Twist subfamily of class B bHLH transcription factors | -21 | -1  | + | 1.000 | 0.958 | tagtcaattCCAGaaaccgct   |
| <i>STAT</i>   | <i>STAT</i> | Signal transducer and activator of transcription      | -20 | -2  | - | 1.000 | 0.896 | gcggtttctGGAAttgact     |

**Supplemental Table 2:** Single-stranded oligonucleotides used for electrophoretic mobility shift assays (EMSA).

| Oligonucleotide name       | Oligonucleotide sequence (5'3')      |
|----------------------------|--------------------------------------|
| Il-6_1_fwd                 | GATTTTATCAAATGTGGGATTTTCCCATGAGT     |
| Il-6_1_rev                 | ACTCATGGGAAAATCCCACATTTGATAAAAAATC   |
| Il-6_2_fwd                 | CTTTCGATGCTAAACGACGTCACATTGTGCAATCTT |
| Il-6_2_rev                 | AAGATTGCACAATGTGACGTCGTTTAGCATCGAAAG |
| Il-6_3_fwd                 | ATGCTCAAGTGCTGAGTCACTTTTAAAGAAAAA    |
| Il-6_3_rev                 | TTTTTCTTTAAAAGTGACTCAGCACTTGAGCAT    |
| Il-6_4_fwd                 | TGTGTCGTCTGTCATGCGCGCGTGCCTGCGTTTAA  |
| IL6_4_rev                  | TTAAACGCAGGCACGCGCGCATGACAGACGACACA  |
| USF consensus sequence_fwd | CACCCGGTCACGTGGCCTACACC              |
| USF consensus sequence_rev | GGTGTAGGCCACGTGACCGGGTG              |
| SP consensus sequence_fwd  | ATTCGATCGGGGCGGGGCGAGC               |
| SP consensus sequence_rev  | GCTCGCCCCGCCCCGATCGAAT               |
| NF-κB consensus site fwd   | TCAGAGGGGACTTTCCGAGAGGCG             |
| NF-κB consensus site rev   | CGCCTCTCGGAAAGTCCCCTCTGA             |
| AP1 consensus sequence_fwd | TGAGTCATGAGTCATGAGTCA                |
| AP1 consensus sequence_rev | TGACTCATGACTCATGACTCA                |

**Supplemental Table 3:** Sequence of primers used to amplify the *Il-6* promoter region for generating luciferase reporter constructs, to verify the correctness of the sequence, and to perform site-directed mutagenesis. Underlined basepairs represent mutated region of a potential transcription factor in the *Il-6* promoter region used for site-directed mutagenesis.

| Primer name       | Primer sequence (5'3')                            | Application                                  |
|-------------------|---------------------------------------------------|----------------------------------------------|
| Il-6 promoter_fwd | CTAACTGGCCGGTACCAgacttgagcattggaggggttattc *      | PCR to amplify <i>Il-6</i> promoter          |
| Il-6 promoter_rev | GGCCAGATCTTGATATCCTCGAGagcgggttctggaattgactatcG * | PCR to amplify <i>Il-6</i> promoter          |
| RVprimer3         | CTAGCAAAATAGGCTGTCCC                              | Sequencing of <i>Il-6</i> promoter construct |
| pGL4.10_rev       | CGGTAAAGGCGATGGTGC                                | Sequencing of <i>Il-6</i> promoter construct |
| Il-6_1_Mut        | GATTTTATCAAATGTGGGAT <u>G</u> TTCCCATGAGTCT       | Site-directed mutagenesis of NF-κB in Il-6_1 |
| Il-6_2_Mut        | CTTTCGATGCTAAACGAT <u>A</u> TCACATTGTGCAATC       | Site-directed mutagenesis of cFos in Il-6_2  |
| Il-6_3_Mut        | CCATCAAGACATGCTCAAGTGCTG <u>C</u> TTCACTTTTAAAG   | Site-directed mutagenesis of cFos in Il-6_3  |
| Il-6_4_Mut (USF)  | GTGTCGTCTGTCATGCGCGT <u>A</u> TGCCTGCGTTTAAATAAC  | Site-directed mutagenesis of USF in Il-6_4   |
| Il-6_4_Mut (cFos) | GTGTGTCGTCTT <u>A</u> CATGCGCGCGTGCCTGC           | Site-directed mutagenesis of cFos in Il-6_4  |

\* Capital letters indicate homologous overlap between the empty pGL4.10 reporter vector the *Il-6* promoter region designed to build the seamless clone using the Gibson Assembly Cloning kit according to manufacturer's protocol (Thermofisher).
